# Supplementary material for: Lentiviral Nef suppresses iron uptake in a strain specific manner through inhibition of Transferrin endocytosis
Source: PubMed Central journal article supplement (PMC3892060; doi:10.1186/1742-4690-11-1), 2014-01-02
Supplement: 1742-4690-11-1-S1.pdf [file 1742-4690-11-1-S1.pdf]

**Supplemental Table S1. Modulation of TfR and previously described PBMC surface receptors by lentiviral Nef proteins.**

| Lineage   | Clone    | Species/subspecies                                  | Modulation (n-fold, $\pm$ SD) of: |                    |                     |                    |                     | Group <sup>(3)</sup> | Ref |
|-----------|----------|-----------------------------------------------------|-----------------------------------|--------------------|---------------------|--------------------|---------------------|----------------------|-----|
|           |          |                                                     | TfR <sup>(1)</sup>                | CD4 <sup>(2)</sup> | MHCI <sup>(2)</sup> | CD3 <sup>(2)</sup> | CD28 <sup>(2)</sup> |                      |     |
| HIV-1/M   | NL4-3    | Human ( <i>Homo sapiens</i> )                       | 1.67 $\pm$ 0.3                    | 2.6                | 3.4                 | 0.8                | 1.7                 | 1                    | 14  |
| HIV-1/M   | NA7      | Human ( <i>Homo sapiens</i> )                       | 1.81 $\pm$ 0.4                    | 3.3                | 3.7                 | 0.8                | 3.8                 | 1                    | 14  |
| HIV-1/O   | MVP8161  | Human ( <i>Homo sapiens</i> )                       | 1.45 $\pm$ 0.3                    | 2.8                | 4.1                 | 0.9                | 1.9                 | 1                    | 14  |
| HIV-1/O   | MVP13127 | Human ( <i>Homo sapiens</i> )                       | 1.30 $\pm$ 0.3                    | 3.2                | 4.6                 | 1.1                | 2.9                 | 1                    | 14  |
| HIV-1/N   | YBF30    | Human ( <i>Homo sapiens</i> )                       | 1.20 $\pm$ 0.2                    | 2.4                | 1.9                 | 1.1                | 1.5                 | 1                    | 14  |
| SIVcpzPtt | GAB2     | Central chimpanzee ( <i>Pan t. troglodytes</i> )    | 1.67 $\pm$ 0.2                    | 3.4                | 2.5                 | 0.7                | 4.5                 | 1                    | 14  |
| SIVcpzPtt | Cam3k1   | Central chimpanzee ( <i>Pan t. troglodytes</i> )    | 1.55 $\pm$ 0.3                    | 2.1                | 1.1                 | 0.7                | 1.3                 | 1                    | 14  |
| SIVcpzPts | TAN1     | Eastern chimpanzee ( <i>Pan t. schweinfurthii</i> ) | 1.02 $\pm$ 0.1                    | 2.3                | 1.3                 | 1.5                | 6.8                 | 1                    | 14  |
| SIVcpzPts | TAN3     | Eastern chimpanzee ( <i>Pan t. schweinfurthii</i> ) | 1.10 $\pm$ 0.4                    | 1.8                | 2.5                 | 1.0                | 2.6                 | 1                    | 14  |
| SIVcpzPts | Nok5     | Eastern chimpanzee ( <i>Pan t. schweinfurthii</i> ) | 1.10 $\pm$ 0.4                    | 2.5                | 3.4                 | 1.1                | 5.9                 | 1                    | 14  |
| SIVgsn    | CM166    | Greater spot-nosed monkey ( <i>C. nictitans</i> )   | 1.13 $\pm$ 0.1                    | 2.2                | 4.9                 | 1.3                | 3.8                 | 1                    | 14  |
| SIVmus    | CMS1085  | Mustached monkey ( <i>Cercopithecus cephus</i> )    | 1.90 $\pm$ 0.4                    | 1.7                | 3.7                 | 0.8                | 1.8                 | 1                    | 14  |
| SIVmon    | CML1     | Mona monkey ( <i>Cercopithecus mona</i> )           | 1.26 $\pm$ 0.2                    | 1.6                | 2.3                 | 0.8                | 2.8                 | 1                    | 14  |
| HIV-2     | BEN      | Human ( <i>Homo sapiens</i> )                       | 1.35 $\pm$ 0.2                    | 1.8                | 5.6                 | 13.9               | 6.8                 | 2                    | 14  |
| HIV-2     | CBL-23   | Human ( <i>Homo sapiens</i> )                       | 1.15 $\pm$ 0.5                    | 2.2                | 5.9                 | 13.1               | 4.0                 | 2                    | 14  |
| HIV-2     | 60415K   | Human ( <i>Homo sapiens</i> )                       | 2.56 $\pm$ 0.5                    | 2.0                | 4.6                 | 11.9               | 1.5                 | 2                    | 14  |
| HIV-2     | 310319   | Human ( <i>Homo sapiens</i> )                       | 1.55 $\pm$ 0.1                    | 1.9                | 4.9                 | 10.7               | 1.8                 | 2                    | 14  |
| SIVsmm    | FFm1     | Sooty mangabey ( <i>Cercocebus atys</i> )           | 1.30 $\pm$ 0.1                    | 2.2                | 3.9                 | 5.4                | 5.0                 | 2                    | 14  |
| SIVsmm    | FYr1     | Sooty mangabey ( <i>Cercocebus atys</i> )           | 2.65 $\pm$ 0.1                    | 1.6                | 3.7                 | 10.3               | 4.6                 | 2                    | 14  |
| SIVsmm    | FWr1     | Sooty mangabey ( <i>Cercocebus atys</i> )           | 2.90 $\pm$ 0.3                    | 1.9                | 3.4                 | 7.1                | 2.6                 | 2                    | 14  |
| SIVmac    | 239      | Rhesus macaque ( <i>Maccaca mulatta</i> )           | 3.27 $\pm$ 0.4                    | 2.2                | 4.4                 | 16.7               | 5.0                 | 2                    | 14  |
| SIVrcm    | GB1      | Red-capped mangabey ( <i>Cercocebus torquatus</i> ) | 3.50 $\pm$ 0.1                    | 1.1                | 1.3                 | 9.9                | 1.4                 | 2                    | 14  |
| SIVdeb    | CM5      | De Brazza monkey ( <i>Cercopithecus neglectus</i> ) | 1.15 $\pm$ 0.2                    | 2.4                | 1.6                 | 8.0                | 6.0                 | 2                    | 14  |
| SIVdeb    | CM40     | De Brazza monkey ( <i>Cercopithecus neglectus</i> ) | 2.00 $\pm$ 0.1                    | 1.6                | 2.4                 | 8.2                | 4.8                 | 2                    | 14  |
| SIVsyk    | KE44     | Sykes` monkey ( <i>Cercopithecus albogularis</i> )  | 2.30 $\pm$ 0.1                    | 1.6                | 2.4                 | 7.5                | 3.9                 | 2                    | 14  |
| SIVsyk    | KE51     | Sykes` monkey ( <i>Cercopithecus albogularis</i> )  | 3.25 $\pm$ 0.1                    | 1.3                | 3.1                 | 12.2               | 6.6                 | 2                    | 14  |
| SIVblu    | KE31     | Blue monkey ( <i>Cercopithecus mitis</i> )          | 2.81 $\pm$ 0.2                    | 1.8                | 5.2                 | 12.1               | 7.2                 | 2                    | 14  |
| SIVsun    | sol-36   | Sun-tailed monkey ( <i>Cercopithecus solatus</i> )  | 2.35 $\pm$ 0.3                    | 2.0                | 2.3                 | 7.3                | 2.4                 | 2                    | 14  |
| SIVtan    | 1        | Tantalus monkey ( <i>Chlorocebus tantalus</i> )     | 3.21 $\pm$ 0.5                    | 2.2                | 2.2                 | 8.8                | 6.2                 | 2                    | 14  |
| SIVtan    | B87-18   | Tantalus monkey ( <i>Chlorocebus tantalus</i> )     | 2.60 $\pm$ 0.2                    | 1.6                | 1.9                 | 11.3               | 5.3                 | 2                    | 14  |
| SIVsab    | 1        | Green monkey ( <i>Chlorocebus sabaeus</i> )         | 2.35 $\pm$ 0.1                    | 1.1                | 4.5                 | 14.2               | 5.1                 | 2                    | 14  |

The Nef-mediated *n*-fold modulation of TfR, CD4, MHCI, CD3 and CD28 was calculated by dividing the mean fluorescence intensity (MFI) of PBMCs infected with a *nef*-deficient HIV-1 expressing GFP by the corresponding MFI obtained for cells infected with HIV-1 constructs coexpressing Nef and GFP. For TfR results are shown in mean values  $\pm$ SD from three to five independent experiments. <sup>(1)</sup>TfR is upregulated while <sup>(2)</sup>CD4, MHCI, CD3 and CD28 are downmodulated. <sup>(3)</sup>Phylogenetical clustering of lentiviral Nef proteins in HIV-1/SIVcpz and SIVprecursors (Group 1) versus HIV-2/SIVsmm/SIVmac and other SIVs (Group 2) according to Ref 14.
