# Supplementary material for: Lentiviral Nef suppresses iron uptake in a strain specific manner through inhibition of Transferrin endocytosis
Source: PubMed Central journal article supplement (PMC3892060; doi:10.1186/1742-4690-11-1), 2014-01-02
Supplement: 1742-4690-11-1-S2.pdf [file 1742-4690-11-1-S2.pdf]

|          | 1           | 11          | 21          | 31         | 41          | 51          | 61          |
|----------|-------------|-------------|-------------|------------|-------------|-------------|-------------|
| NL43     | MGGKWSKSSV  | IGWPAVRERM  | RRA-----    | -EPAAD---G | VGAVSRDLEK  | HGAITSSNTA  | ANNAAC----  |
| Na7      | .....R.A    | G..S...K..  | EQ-----     | -.....---  | .....       | Y.....      | T...D----   |
| Gab2     | ..N.....I   | V...Q....L  | ..T-----    | -QE..E---- | ..E..Q..AR  | R....RH.P   | QT.QTL----  |
| Cam3     | ..NR.....L  | V...D....L  | ..T-----    | -Q...P---- | ..P..Q...A  | ..V.TRH.P   | Q..QTL----  |
| YBF30    | ..KI.....L  | ...EI....   | ..QTQ-----  | -...VEPAV. | A..A..Q..AN | R....IR..R  | D..ESI----  |
| 8161     | ..NVLG.GKF  | E..SR.....  | .KTT-----   | -PEPEPCAP. | ..QI..QE.AA | R.G.PN.Y.P  | Q....L----  |
| 13127    | ..NVLT..QF  | P..AT...K.  | ..TSRRTSRT  | PEPEPCAP.  | ..QI..E.AA  | R.G.P..Y.P  | Q....L----  |
| Tan1     | ..NIFGR--W  | P..ARKAI.DL | HNT-----    | --SSEP---- | ..QA.Q..QN  | K.GL.TNTLG  | TSADVL----  |
| Tan3     | ..NIFG.--W  | P..AQRAI.EL | HKS-----    | --SHEP---- | ..QA.K..QN  | R.GL.TNTIG  | TPEDVL----  |
| Nok5     | ..SA...IKW  | V.ARQAIRKI  | HET-----    | --NPD.---- | I.PCGKE.AS  | R..L...TIG  | TEKDVI----  |
| GSN      | ..S.N...QQQ | QESSTALLSS  | .GTGQRFYFT  | LVDEYGENFW | LSPDAS.KGR  | RYYL.E--EP  | KPKRG----   |
| Mon      | ..S.S...QQS | PLSSTPLLGS  | QSSGRMYFM   | L.DDYGEQSW | LSPDAS.R.R  | KYSL.EGRNG  | KQRRQ----   |
| Mus      | ..S.S..QPA  | QQSLISSPPS  | PGTGRKQYFK  | LVEEYGENSW | LSPDASGRGR  | RYSL.E--G   | .SKRP----   |
| Ben      | ..ASG..KLS  | KHSRGL...L  | L..RGDGYGK  | QRD.SGGEYS | QFQEESGR.Q  | NSPSCBEGQY  | QQGEYMNTPW  |
| CBL23    | ..ASG..ERS  | RPSQGL...L  | L..RGETCGG  | HCSGSGGEYL | QSQEESGR.Q  | RSPSYEGQRY  | QQGDFMNTPW  |
| 310319   | ..SAG..KQS  | KQQQGL...L  | L..RRGHYGE  | LSGQREGSL  | RSPGES.KGL  | NSPSCBEGQK  | LGAEQGG---  |
| FFm1     | ...VT..KQR  | KRGGNL...L  | LQ.RGETCGK  | LWDGSEGEYL | QFQDASGRGL  | SSLSCEPQRY  | CEGQFMNTPW  |
| CM5      | ...N..TPS   | F.QGKKSQSG  | SKGLLRWRYK  | DLSGEAETFS | PFLQES.K.Q  | SCYS.EEPLY  | .DPHRE----  |
| 60414    | ..ASG..KRS  | RQPRGLQ..L  | L..RAGACGG  | YWNESGGQYS | RSQEGSGR.Q  | RSPSCBEGQRY | QQGDFMNTPW  |
| FYr1     | ...VT..KQS  | RPQREL..KL  | LQ.RGETYGR  | LWEGLEEGYS | QSRGGLGRDW  | SLRSCBEGQKY | SEGQFMNTPW  |
| FWr1     | ...VT..KQS  | KRRQGL...L  | LQ.RGETYGR  | LWEGLEDGYS | RSRGELGKGW  | NLPSCEBEGQY | SEEQFMNTPW  |
| 239      | ..AI.MRRS   | RPSGDL.Q.L  | L..RGETYGR  | LLGEVEDGYS | QSPGGL.KGL  | SSLSCEBEGQY | NQQYFMNTPW  |
| RCM      | ...S..N.A   | A.LLRW.FK.  | LTPGEGYVR   | WHETLLDGQP | WC.EGSGRAS  | RDFVIRGGIT  | .ETQ.S----  |
| Agmtan1  | ..SN..REQ   | Q.LLRLWRAL  | .K.PVVR YGM | LADPLIGQSS | NIQE.C.KNW  | N.GS.R--RG  | KSTPEG----  |
| Agmtan18 | ..SN..KEQ   | E.LLKMWRL.  | .K.PVVR YDM | LADPLIGTSS | SIQE.C.KNW  | S.GL.K-GKG  | KMTPEG----  |
| Agmsab   | ...S..QQQ   | RHSLWLWSKL  | .Q.PVIQ YDM | LADPLLGQSS | HIQE.CAKSL  | RDGLIRQGDS  | SRTEEG----  |
| CM40     | ...N..IPS   | R.QVGSFGSG  | S.GLLRWR YR | DLSEQEEQFS | ECLLES.R.Q  | SSSS.E--FW  | GSPRRE----  |
| Syk44    | ..SVK.RMQQ  | SA.EDRL.TG  | WWKRRGKYTP  | FPD.LLRASL | PSRGGF.KAW  | RSTL.EPIDP  | HGPD RD---- |
| Blu31    | ..STS..NQQ  | CRSESPYGT   | WWRRAK YTP  | LPDELLKPSR | PSHGGF.KAW  | RSTL.EPVPD  | HGPD RD---- |
| Syk51    | ..SQS..KQP  | SR.DEKWRTR  | WWPFGK YSP  | MPDELLRMSQ | PYHEDF.RGW  | RSTL.EPI--  | LDPKRD----  |
| Sun36    | ..NAFG.P.E  | V..VRTLFKL  | .AGSGTRAEP  | AGR.YHRIR. | ETEPLRSNPD  | G.LEELEE.E  | VGFPVRPQRP  |

**Supplemental Figure S2: Alignment of the N-terminus of Nef variants analyzed.** The first 70 aminoacids of all lentiviral Nefs analyzed in this study were aligned. The tyrosine of the putative AP2-binding motif Yxx $\phi$  is marked in red. All Nef variants inactive in TfR upregulation are grouped by the red square whereas Nef proteins inhibiting TfR uptake are surrounded by the green square.
