# Supplementary material for: Lentiviral Nef suppresses iron uptake in a strain specific manner through inhibition of Transferrin endocytosis
Source: PubMed Central journal article supplement (PMC3892060; doi:10.1186/1742-4690-11-1), 2014-01-02
Supplement: 1742-4690-11-1-S3.pdf [file 1742-4690-11-1-S3.pdf]

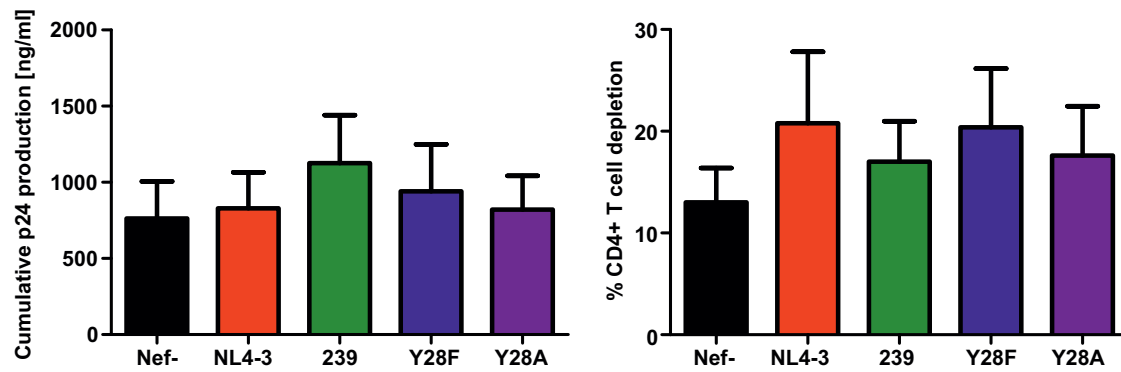

**Supplemental Figure S3: SIV 239 Nef with or without mutated Y28 motif does not affect HIV-1 replication and CD4+ T cell depletion in *ex vivo* infected human lymphoid tissue (HLT).** Cumulative p24 production over 13 days (left) and CD4+ T cell depletion at the end of the culture period (right) in tissues of five donors infected with the indicated R5-tropic HIV-1 NL4-3 variants. Shown are mean values +/- SEM.
